# Supplementary material
Source: ML conference proceedings conference paper supplement (https://www.ecva.net/papers/eccv_2020/papers_ECCV/html/123580698_ECCV_2020_paper.php)
Supplement: Supplementary file 1 [file 123580698-supp.pdf]

# Supplementary Material for Length-Controllable Image Captioning

## I Setting of [EOS] decay factor $\gamma$

We perform cross validation on MS COCO Caption Karpathy’s val split to determine the value of  $\gamma$ . We set  $\gamma$  to different values for different levels in 4-level LaBERT. Specifically,  $\gamma$  is set to 0.88 and 0.95 for the second and third level of 4-level LaBERT, respectively. While for the first and the last level, we find the model performs well without [EOS] decay, *i.e.*,  $\gamma = 1.0$ .

|                                                                                    |                                                                                                     |               |
|------------------------------------------------------------------------------------|-----------------------------------------------------------------------------------------------------|---------------|
|   |                                                                                                     |               |
| Ori                                                                                | A group of men on a field playing baseball.                                                         | <b>VLP</b>    |
| Lv1                                                                                | Some baseball players are playing a baseball game.                                                  |               |
| Lv2                                                                                | A group of men on a field playing baseball.                                                         |               |
| Lv3                                                                                | A baseball game in progress with the batter up to plate waiting for the pitch.                      |               |
| Lv4                                                                                | A baseball game in progress with the batter up to plate and the catcher ready to catch the ball.    |               |
| <hr/>                                                                              |                                                                                                     |               |
| Ori                                                                                | A baseball player holding a bat next to home plate.                                                 | <b>AoANet</b> |
| Lv1                                                                                | A baseball player standing next to home plate.                                                      |               |
| Lv2                                                                                | A baseball player holding a bat on a field.                                                         |               |
| Lv3                                                                                | A baseball player holding a bat on a field with a crowd of people watching.                         |               |
| Lv4                                                                                | Baseball game with a batter at home plate and a catcher and umpire behind him and a crowd watching. |               |
| <hr/>                                                                              |                                                                                                     |               |
| Lv1                                                                                | A baseball game in progress in a stadium.                                                           | <b>LaBERT</b> |
| Lv2                                                                                | A baseball player holding a bat on a field.                                                         |               |
| Lv3                                                                                | A baseball player holding a bat on top of a field during a game.                                    |               |
| Lv4                                                                                | A baseball game with a batter at home plate and a catcher behind him ready to catch the ball.       |               |
| <hr/>                                                                              |                                                                                                     |               |
|  |                                                                                                     |               |
| Ori                                                                                | A group of people that are sitting under umbrellas.                                                 | <b>VLP</b>    |
| Lv1                                                                                | A group of people sitting under red umbrella.                                                       |               |
| Lv2                                                                                | A group of people that are sitting under umbrellas.                                                 |               |
| Lv3                                                                                | A group of people sitting under umbrellas next to a body of water.                                  |               |
| Lv4                                                                                | A group of people sitting under umbrellas next to a body of water on a cloudy day.                  |               |
| <hr/>                                                                              |                                                                                                     |               |
| Ori                                                                                | A group of people sitting at tables under umbrellas.                                                | <b>AoANet</b> |
| Lv1                                                                                | A group of people sitting under red umbrellas.                                                      |               |
| Lv2                                                                                | A group of people sitting under umbrellas on a boat.                                                |               |
| Lv3                                                                                | A group of people sitting under umbrellas on the side of a street under a tree.                     |               |
| Lv4                                                                                | A group of people sitting under umbrellas on the side of the road with a red umbrella over them.    |               |
| <hr/>                                                                              |                                                                                                     |               |
| Lv1                                                                                | A group of people sitting on a boat.                                                                | <b>LaBERT</b> |
| Lv2                                                                                | A group of people sitting at tables by the water.                                                   |               |
| Lv3                                                                                | A group of people sitting at a table on the side of a river.                                        |               |
| Lv4                                                                                | A group of people sitting at the side of a boat with palm trees and buildings in the background.    |               |

**Fig. 1.** Examples of Length-Controllable Image Captioning from test split. “Ori” denotes the original results of AoANet or VLP. “Lv $n$ ” denotes results on level  $n$ .

## II Examples of Length-Controllable Image Captioning

We show more examples of our 4-level AoANet, 4-level VLP, and 4-level LaBERT in Fig. 1-4.

## III Examples of the Refine Process in LaBERT

We show examples of the refine process of our 4-level LaBERT in Fig. 5 and Fig. 6.

|                                                                                     |                                                                                                    |
|-------------------------------------------------------------------------------------|----------------------------------------------------------------------------------------------------|
|    |                                                                                                    |
| Ori                                                                                 | A white toilet sitting next to a sink in a bathroom. <b>VLP</b>                                    |
| Lv1                                                                                 | A bathroom with a toilet sink and mirror.                                                          |
| Lv2                                                                                 | A white toilet sitting next to a bathroom sink.                                                    |
| Lv3                                                                                 | A bathroom with a white toilet sitting next to a sink under a mirror.                              |
| Lv4                                                                                 | A bathroom with a white toilet sitting next to a sink and a bathtub with a shower curtain.         |
| Ori                                                                                 | A white toilet sitting next to a bath tub. <b>AoANet</b>                                           |
| Lv1                                                                                 | A bathroom with a toilet sink and shower.                                                          |
| Lv2                                                                                 | A white toilet sitting next to a bath tub.                                                         |
| Lv3                                                                                 | A bathroom with a toilet a sink and a shower with a shower curtain.                                |
| Lv4                                                                                 | A bathroom with a white toilet sitting next to a white sink and a shower with a white curtain.     |
| Lv1                                                                                 | A bathroom with white walls and brown floor. <b>LaBERT</b>                                         |
| Lv2                                                                                 | A bathroom with a sink toilet and a shower.                                                        |
| Lv3                                                                                 | A bathroom with a white toilet a white sink and a white shower curtain.                            |
| Lv4                                                                                 | A bathroom with a brown tile and wood floor and a white bathtub with a white shower curtain.       |
|   |                                                                                                    |
| Ori                                                                                 | A man riding on the back of a brown horse. <b>VLP</b>                                              |
| Lv1                                                                                 | A man riding a horse down a street.                                                                |
| Lv2                                                                                 | A man riding on the back of a brown horse.                                                         |
| Lv3                                                                                 | A man riding on the back of a brown horse down a city street.                                      |
| Lv4                                                                                 | A man in a green jacket riding a brown horse in front of a group of people on a sidewalk.          |
| Ori                                                                                 | Two men and a woman are riding horses. <b>AoANet</b>                                               |
| Lv1                                                                                 | A group of people sitting on some horses.                                                          |
| Lv2                                                                                 | A group of people riding on the backs of horses.                                                   |
| Lv3                                                                                 | A group of people riding on the back of horses next to a building                                  |
| Lv4                                                                                 | A group of people sitting on horses in front of a building with a group of people standing around. |
| Lv1                                                                                 | A man that is sitting on a horse. <b>LaBERT</b>                                                    |
| Lv2                                                                                 | A man riding on the back of a brown horse.                                                         |
| Lv3                                                                                 | A man riding on the back of a brown horse next to other people.                                    |
| Lv4                                                                                 | A man in a green coat and hat sitting on a horse with a woman standing next to him.                |
|  |                                                                                                    |
| Ori                                                                                 | A red airplane sitting on top of an airport runway. <b>VLP</b>                                     |
| Lv1                                                                                 | A person standing next to a small plane.                                                           |
| Lv2                                                                                 | A red and white plane sitting on top of a runway.                                                  |
| Lv3                                                                                 | A red and white plane sitting on top of an airport tarmac.                                         |
| Lv4                                                                                 | A red and white plane sitting on top of a tarmac with a man standing next to it .                  |
| Ori                                                                                 | A red and white plane sitting on a runway. <b>AoANet</b>                                           |
| Lv1                                                                                 | A small red plane on a run way.                                                                    |
| Lv2                                                                                 | A red and white plane sitting on a runway.                                                         |
| Lv3                                                                                 | A red and white plane sitting on top of a runway next to a runway.                                 |
| Lv4                                                                                 | A red and white airplane with a red tail on the tail and a person standing in front of it.         |
| Lv1                                                                                 | A small red airplane sitting on a runway. <b>LaBERT</b>                                            |
| Lv2                                                                                 | A small red and white airplane sitting on a runway.                                                |
| Lv3                                                                                 | A red and white plane parked on a runway with a person beside it.                                  |
| Lv4                                                                                 | A red and white plane sitting on top of a tarmac with a person standing next to it.                |
|  |                                                                                                    |
| Ori                                                                                 | A group of birds sitting on top of a pond. <b>VLP</b>                                              |
| Lv1                                                                                 | A bird that is standing in the water.                                                              |
| Lv2                                                                                 | A close up of a bird on a leafy plant.                                                             |
| Lv3                                                                                 | A close up of a bird on a leafy plant in a pond.                                                   |
| Lv4                                                                                 | A close up of a bird in a pond with leaves and water lilies in the background.                     |
| Ori                                                                                 | A bird is sitting on a branch of a tree. <b>AoANet</b>                                             |
| Lv1                                                                                 | A bird that is sitting in a tree.                                                                  |
| Lv2                                                                                 | A bird is perched on the branch of a tree.                                                         |
| Lv3                                                                                 | A bird is perched on the branch of a tree with leaves and leaves.                                  |
| Lv4                                                                                 | A bird is perched on the branch of a tree with leaves and leaves on the side of it.                |
| Lv1                                                                                 | A black bird is sitting in the water. <b>LaBERT</b>                                                |
| Lv2                                                                                 | A black bird is swimming in a pool of water.                                                       |
| Lv3                                                                                 | A black bird sitting on a planter next to a body of water.                                         |
| Lv4                                                                                 | A black bird with its wings spread feeding on a plant on the side of a body of water.              |

**Fig. 2.** Examples of Length-Controllable Image Captioning from **test** split. “Ori” denotes the original results of AoANet or VLP. “Lv $n$ ” denotes results on level  $n$ .

|                                                                                     |                                                                                                 |               |
|-------------------------------------------------------------------------------------|-------------------------------------------------------------------------------------------------|---------------|
|    |                                                                                                 |               |
| Ori                                                                                 | A plane is parked behind a chain link fence.                                                    | <b>VLP</b>    |
| Lv1                                                                                 | A plane that is sitting behind a fence.                                                         |               |
| Lv2                                                                                 | A plane is parked behind a chain link fence.                                                    |               |
| Lv3                                                                                 | A blue and white plane sitting on top of a field behind a fence.                                |               |
| Lv4                                                                                 | A blue and white plane sitting on top of a field next to a chain link fence and a fence.        |               |
| Ori                                                                                 | A small plane sitting on top of an airport tarmac.                                              | <b>AoANet</b> |
| Lv1                                                                                 | A small plane is parked behind a fence.                                                         |               |
| Lv2                                                                                 | A small airplane sitting on top of a tarmac.                                                    |               |
| Lv3                                                                                 | A small plane is parked on the fence and a fence is behind it.                                  |               |
| Lv4                                                                                 | a small airplane is parked on a fence and a fence with a chain link fence in the background.    |               |
| Lv1                                                                                 | A small airplane is parked behind a fence.                                                      | <b>LaBERT</b> |
| Lv2                                                                                 | A small airplane is parked behind a chain link fence.                                           |               |
| Lv3                                                                                 | A plane with propellor parked in front of a chain link fence.                                   |               |
| Lv4                                                                                 | A small blue propellor airplane sitting on top of a wooden floor behind a chain link fence.     |               |
|   |                                                                                                 |               |
| Ori                                                                                 | A woman sitting on a bench next to a dog.                                                       | <b>VLP</b>    |
| Lv1                                                                                 | A woman and a dog on a bench.                                                                   |               |
| Lv2                                                                                 | A woman sitting on a bench next to a dog.                                                       |               |
| Lv3                                                                                 | A woman sitting on a bench with a dog sitting on top of it.                                     |               |
| Lv4                                                                                 | A woman sitting on a bench with a dog sitting on it in front of a chain link fence.             |               |
| Ori                                                                                 | A woman sitting on a bench with a dog.                                                          | <b>AoANet</b> |
| Lv1                                                                                 | A woman is sitting on a wooden bench.                                                           |               |
| Lv2                                                                                 | A woman sitting on a bench with a dog.                                                          |               |
| Lv3                                                                                 | A woman sitting on a bench with a dog and a dog on a leash.                                     |               |
| Lv4                                                                                 | A woman sitting on a bench with a dog on her lap and a dog sitting on a bench.                  |               |
| Lv1                                                                                 | A woman and a dog on a bench.                                                                   | <b>LaBERT</b> |
| Lv2                                                                                 | A woman and a dog sitting on a wooden bench.                                                    |               |
| Lv3                                                                                 | A woman sitting on a bench next to a dog sitting on a log.                                      |               |
| Lv4                                                                                 | A woman sitting on a bench with a dog on top of it sitting in front of a fence.                 |               |
|   |                                                                                                 |               |
| Ori                                                                                 | A group of zebra standing next to each other.                                                   | <b>VLP</b>    |
| Lv1                                                                                 | Three zebras are standing near water.                                                           |               |
| Lv2                                                                                 | A group of zebra standing next to each other.                                                   |               |
| Lv3                                                                                 | A herd of zebra standing next to each other on a field.                                         |               |
| Lv4                                                                                 | A herd of zebra standing on top of a lush green field next to a watering hole.                  |               |
| Ori                                                                                 | A group of zebras standing next to a watering hole.                                             | <b>AoANet</b> |
| Lv1                                                                                 | A group of zebras standing near a water.                                                        |               |
| Lv2                                                                                 | A herd of zebra standing next to each other on a field.                                         |               |
| Lv3                                                                                 | A herd of zebra standing next to each other on top of a dirt field.                             |               |
| Lv4                                                                                 | A herd of zebra standing next to each other on a dirt field next to a body of water.            |               |
| Lv1                                                                                 | A group of zebra standing near a lake.                                                          | <b>LaBERT</b> |
| Lv2                                                                                 | A group of zebras standing next to a watering hole.                                             |               |
| Lv3                                                                                 | A group of zebras standing next to a herd of antelope.                                          |               |
| Lv4                                                                                 | Three zebras standing next to a body of water with a couple of other animals in the background. |               |
|  |                                                                                                 |               |
| Ori                                                                                 | A woman riding a wave on top of a surfboard.                                                    | <b>VLP</b>    |
| Lv1                                                                                 | A woman surfing a wave in the ocean.                                                            |               |
| Lv2                                                                                 | A woman riding a wave on top of a surfboard.                                                    |               |
| Lv3                                                                                 | A woman riding a wave on top of a surfboard in the ocean.                                       |               |
| Lv4                                                                                 | A woman in a wetsuit riding a wave on top of a surfboard in the ocean.                          |               |
| Ori                                                                                 | A person riding a surf board on a wave.                                                         | <b>AoANet</b> |
| Lv1                                                                                 | A person on a surfboard riding a wave.                                                          |               |
| Lv2                                                                                 | A person riding a surf board on a wave.                                                         |               |
| Lv3                                                                                 | A surfer in a wet suit riding a wave on top of a surfboard.                                     |               |
| Lv4                                                                                 | A man in a wet suit surfing on a wave in the ocean with a surfboard in the background.          |               |
| Lv1                                                                                 | A surfer riding the crest of the wave.                                                          | <b>LaBERT</b> |
| Lv2                                                                                 | A person on a surfboard riding a wave in the ocean.                                             |               |
| Lv3                                                                                 | woman riding a surfboard on top of a wave in the ocean.                                         |               |
| Lv4                                                                                 | A person in a wetsuit riding a surfboard on the top of a wave in the ocean.                     |               |

**Fig. 3.** Examples of Length-Controllable Image Captioning from **test** split. “Ori” denotes the original results of AoANet or VLP. “Lv $n$ ” denotes results on level  $n$ .

|                                                                                     |                                                                                                             |
|-------------------------------------------------------------------------------------|-------------------------------------------------------------------------------------------------------------|
|    |                                                                                                             |
| Ori                                                                                 | A bedroom with a desk and a bed.                                                                            |
| Lv1                                                                                 | A bedroom with a bed and a desk.                                                                            |
| Lv2                                                                                 | A bedroom with a bed desk and a chair.                                                                      |
| Lv3                                                                                 | A bedroom with a bed and a desk with a computer on top of it.                                               |
| Lv4                                                                                 | A bedroom with a bed and a desk with a chair and a desk with a computer on it.                              |
| <hr/>                                                                               |                                                                                                             |
| Ori                                                                                 | A bedroom with a bed desk chair and computer.                                                               |
| Lv1                                                                                 | A bedroom with a bed and a desk.                                                                            |
| Lv2                                                                                 | A bedroom with a bed a desk and a chair.                                                                    |
| Lv3                                                                                 | A bedroom with a bed a desk a chair and a computer on it.                                                   |
| Lv4                                                                                 | A bedroom with a bed a desk and a desk with a computer on it and a chair.                                   |
| <hr/>                                                                               |                                                                                                             |
| Lv1                                                                                 | A bedroom with a bed and a desk.                                                                            |
| Lv2                                                                                 | A bedroom with a bed a desk and a chair.                                                                    |
| Lv3                                                                                 | A bedroom with a bed a desk a chair and a window in it.                                                     |
| Lv4                                                                                 | A bedroom with a bed a computer desk a chair and a window and some pictures on the wall.                    |
| <hr/>                                                                               |                                                                                                             |
|   |                                                                                                             |
| Ori                                                                                 | A couple of men standing on top of a snow covered slope.                                                    |
| Lv1                                                                                 | Two people on skis in the snow.                                                                             |
| Lv2                                                                                 | A couple of people standing on top of a snow covered slope.                                                 |
| Lv3                                                                                 | Two people standing on skis on top of a snow covered ski slope.                                             |
| Lv4                                                                                 | Two people standing on skis on a snowy mountain top with a ski lift in the background.                      |
| <hr/>                                                                               |                                                                                                             |
| Ori                                                                                 | Two people standing on skis in the snow.                                                                    |
| Lv1                                                                                 | Two people standing on skis in the snow.                                                                    |
| Lv2                                                                                 | A couple of people standing on top of a snow covered slope.                                                 |
| Lv3                                                                                 | A couple of people standing on top of a snow covered ski slope.                                             |
| Lv4                                                                                 | Two people standing on top of a snow covered ski slope with a ski lift in the background.                   |
| <hr/>                                                                               |                                                                                                             |
| Lv1                                                                                 | Two people are standing on a ski slope.                                                                     |
| Lv2                                                                                 | Two people on skis standing on a snowy mountain.                                                            |
| Lv3                                                                                 | Two skiers standing on a snowy mountain in front of a ski lift.                                             |
| Lv4                                                                                 | Two skiers standing on top of a snow covered ski slope with a ski lift in the background.                   |
| <hr/>                                                                               |                                                                                                             |
|   |                                                                                                             |
| Ori                                                                                 | A rusted out truck sitting in a field of flowers.                                                           |
| Lv1                                                                                 | An old rusty truck sitting in a field.                                                                      |
| Lv2                                                                                 | A rusted out truck sitting in a field of flowers.                                                           |
| Lv3                                                                                 | A rusted out truck sitting in a field of wildflowers.                                                       |
| Lv4                                                                                 | A rusted out truck sitting in a field of wildflowers next to a bunch of trees.                              |
| <hr/>                                                                               |                                                                                                             |
| Ori                                                                                 | An old rusted out truck sitting in a field of flowers.                                                      |
| Lv1                                                                                 | An old rusty truck sitting in a field.                                                                      |
| Lv2                                                                                 | An old rusty truck is sitting in a field.                                                                   |
| Lv3                                                                                 | An old rusty truck with a rusted out of it sitting in a field of flowers.                                   |
| Lv4                                                                                 | An old rusty truck with a rusted out of it sitting in the middle of a field of yellow flowers.              |
| <hr/>                                                                               |                                                                                                             |
| Lv1                                                                                 | An old truck is parked in a field.                                                                          |
| Lv2                                                                                 | An old truck sitting in a field of flowers.                                                                 |
| Lv3                                                                                 | An old truck sitting in a field of flowers next to a forest area.                                           |
| Lv4                                                                                 | An old truck parked in a field of weeds with a lot of flowers and trees in the background.                  |
| <hr/>                                                                               |                                                                                                             |
|  |                                                                                                             |
| Ori                                                                                 | Three people sitting on a couch holding game controllers.                                                   |
| Lv1                                                                                 | Three people are playing a video game together.                                                             |
| Lv2                                                                                 | Three people sitting on a couch holding wii remotes.                                                        |
| Lv3                                                                                 | Three people sitting on a couch holding nintendo wii remotes.                                               |
| Lv4                                                                                 | Three people sitting on a couch one holding a nintendo wii controller and the other holding a nintendo wii. |
| <hr/>                                                                               |                                                                                                             |
| Ori                                                                                 | A group of young men playing a game with nintendo wii controllers.                                          |
| Lv1                                                                                 | A group of people playing a video game.                                                                     |
| Lv2                                                                                 | A group of young men playing a game with nintendo wii controllers.                                          |
| Lv3                                                                                 | A group of young men standing next to each other holding nintendo wii controllers.                          |
| Lv4                                                                                 | A group of young men standing next to each other in front of a couch holding a nintendo wii game            |
| <hr/>                                                                               |                                                                                                             |
| Lv1                                                                                 | Three young men playing a video game together.                                                              |
| Lv2                                                                                 | Three young men playing a game with remote controllers.                                                     |
| Lv3                                                                                 | Three men sitting in a living room with two them holding wii remotes.                                       |
| Lv4                                                                                 | Three young men sitting in a room with a yellow wall and two of them holding wii remotes.                   |
| <hr/>                                                                               |                                                                                                             |

**Fig. 4.** Examples of Length-Controllable Image Captioning from **test** split. “Ori” denotes the original results of AoANet or VLP. “Lv $n$ ” denotes results on level  $n$ .

|                                                                                     |                                                                                                       |
|-------------------------------------------------------------------------------------|-------------------------------------------------------------------------------------------------------|
|    | <b>Level 1 refine process (total steps 10):</b>                                                       |
|                                                                                     | Step 2 A signs signs signs attached on brick wall.                                                    |
|                                                                                     | Step 4 A red sign attached on a brick wall.                                                           |
|                                                                                     | Step 6 Two red signs signs on a brick wall.                                                           |
|                                                                                     | Step 8 Two street signs hanging on a brick wall.                                                      |
|                                                                                     | Step 10 Two street signs mounted on a brick wall.                                                     |
|    | <b>Level 2 refine process (total steps 15):</b>                                                       |
|                                                                                     | Step 3 A plate plate food with bread bread bread bread a.                                             |
|                                                                                     | Step 6 A plate of food with bread on a a a.                                                           |
|                                                                                     | Step 9 A plate of food with bread bread and bread it.                                                 |
|                                                                                     | Step 12 A plate of food with bread and eggs on it.                                                    |
|                                                                                     | Step 15 A plate of food with bread and eggs on it.                                                    |
|  | <b>Level 3 refine process (total steps 20):</b>                                                       |
|                                                                                     | Step 4 A elephants of elephants a a a a a in the background.                                          |
|                                                                                     | Step 8 A group of elephants standing in a a of a a in the background.                                 |
|                                                                                     | Step 12 A group of elephants walking in a water with with trees in the background.                    |
|                                                                                     | Step 16 A group of elephants walking in a shallow hole with trees in the background.                  |
|                                                                                     | Step 20 A group of elephants walking through a watering hole with trees in the background.            |
|  | <b>Level 4 refine process (total steps 25):</b>                                                       |
|                                                                                     | Step 5 A man standing standing a a a a a a a in the the.                                              |
|                                                                                     | Step 10 A man standing standing the side of a a a a a cow a the mountains in the background.          |
|                                                                                     | Step 15 A man standing a a cow a a a cow of a a road with mountains in the background.                |
|                                                                                     | Step 20 A man standing a a shirt next to a cow on a green field with mountains in the background.     |
|                                                                                     | Step 25 A man standing on a sidewalk next to a cow on a green field with mountains in the background. |

Fig. 5. Examples of the Refine Process from COCO test split.

|                                                                                     |                                                 |                                                                                           |
|-------------------------------------------------------------------------------------|-------------------------------------------------|-------------------------------------------------------------------------------------------|
|    | <b>Level 1 refine process (total steps 10):</b> |                                                                                           |
|                                                                                     | Step 2                                          | A man riding a motorcycle on a road.                                                      |
|                                                                                     | Step 4                                          | A man riding a motorcycle on a road.                                                      |
|                                                                                     | Step 6                                          | A person riding a motorcycle down a road.                                                 |
|                                                                                     | Step 8                                          | A person riding a motorcycle on a road.                                                   |
|                                                                                     | Step 10                                         | A person riding a motorcycle on a road.                                                   |
|    | <b>Level 2 refine process (total steps 15):</b> |                                                                                           |
|                                                                                     | Step 3                                          | A train train covered covered on on on on tracks.                                         |
|                                                                                     | Step 6                                          | A train with covered on on on on tracks.                                                  |
|                                                                                     | Step 9                                          | A train with covered in is sitting on the tracks.                                         |
|                                                                                     | Step 12                                         | A train with graffiti on is sitting on the tracks.                                        |
|                                                                                     | Step 15                                         | A train with colorful graffiti is sitting on the tracks.                                  |
|  | <b>Level 3 refine process (total steps 20):</b> |                                                                                           |
|                                                                                     | Step 4                                          | A wooden room with with with a a and vase vase vase in flowers.                           |
|                                                                                     | Step 8                                          | A wooden table with a large of and and vase flowers flowers the it.                       |
|                                                                                     | Step 12                                         | A wooden table with a vase of flowers sitting it bottles of of windows.                   |
|                                                                                     | Step 16                                         | A wooden table with a vase of flowers on it next to large windows.                        |
|                                                                                     | Step 20                                         | A wooden table with a vase of flowers on it next to large windows.                        |
|  | <b>Level 4 refine process (total steps 25):</b> |                                                                                           |
|                                                                                     | Step 5                                          | A polar bear in in in water water water ball ball ball ball ball ball ball the the.       |
|                                                                                     | Step 10                                         | A polar bear in in the water water water ball ball ball ball ball ball ball in the water. |
|                                                                                     | Step 15                                         | A polar bear is in the paw paw paw paw paw paw with a a ball in the water.                |
|                                                                                     | Step 20                                         | A polar bear laying on its back legs its paw and playing with a blue ball in the water.   |
|                                                                                     | Step 25                                         | A polar bear laying on its back on one paw and playing with a blue ball in the water.     |

**Fig. 6.** Examples of the Refine Process from COCO `test` split.
